# Supplementary material for: A highly selective silver ion optical chemosensor based on isoxazolyl-azo pyrimidine: synthesis, spectroscopy, DFT calculations and applications
Source: Royal Society of Chemistry journal article supplement (doi:10.1039/d2ay00868h), 2022-01-01
Supplement: d2ay00868h1.pdf [file d2ay00868h1.pdf]

## Supporting Information for

### ‘Highly selective silver ion optical chemosensor based on isoxazoly-azo pyrimidine: Synthesis, Spectroscopy, DFT calculations and applications’

Sobhan Asadpour Chounechenan, Asadollah Mohammadi\*, Behzad Khalili

Department of Chemistry, Faculty of Sciences, University of Guilan, Rasht, Iran

E-mail: a\_mohammadi@guilan.ac.ir

#### Figure captions

**Figure S1.** FT-IR spectrum of PICS

**Figure S2.**  $^1\text{H}$  NMR spectrum of PICS.

**Figure S3.**  $^{13}\text{C}$  NMR spectrum of PICS.

**Figure S4.** (a) Job's plot diagram for PICS- $\text{Ag}^+$  complexation, (b) Plot of  $1/(A-A_0)$  versus the  $1/[\text{Ag}^+]$  to estimate the bonding constant.

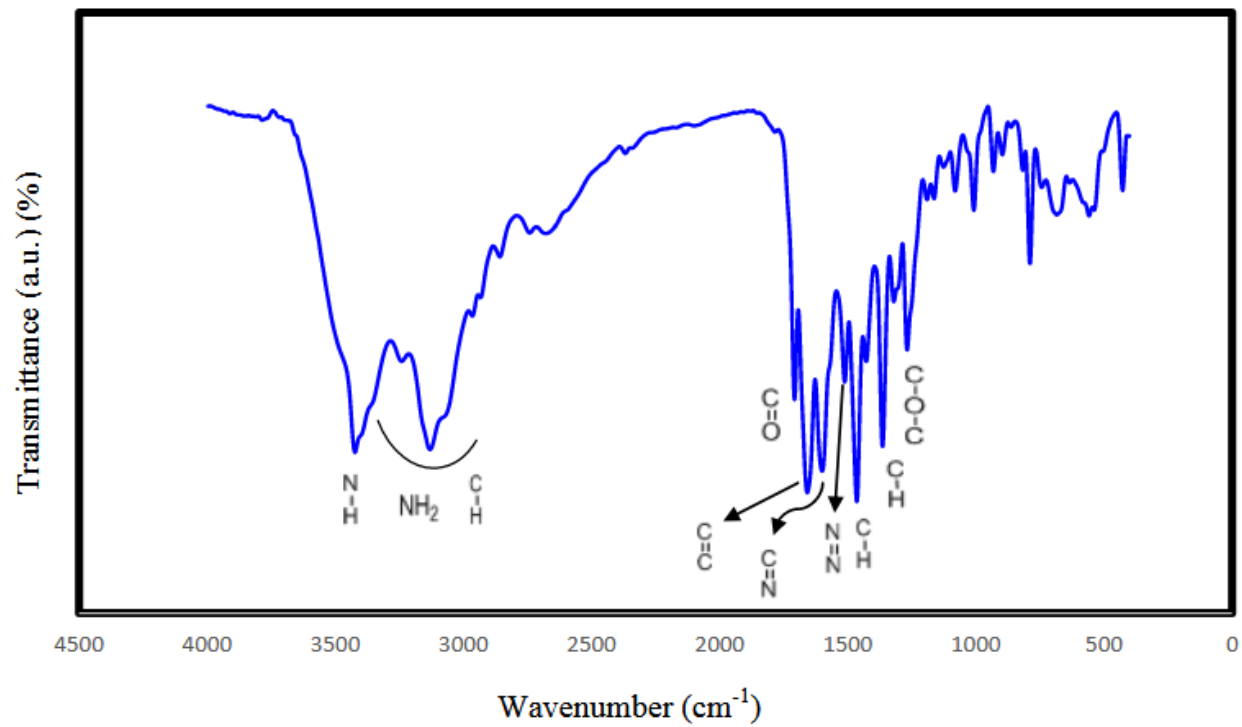

**Figure S1.** FT-IR spectrum of PICS

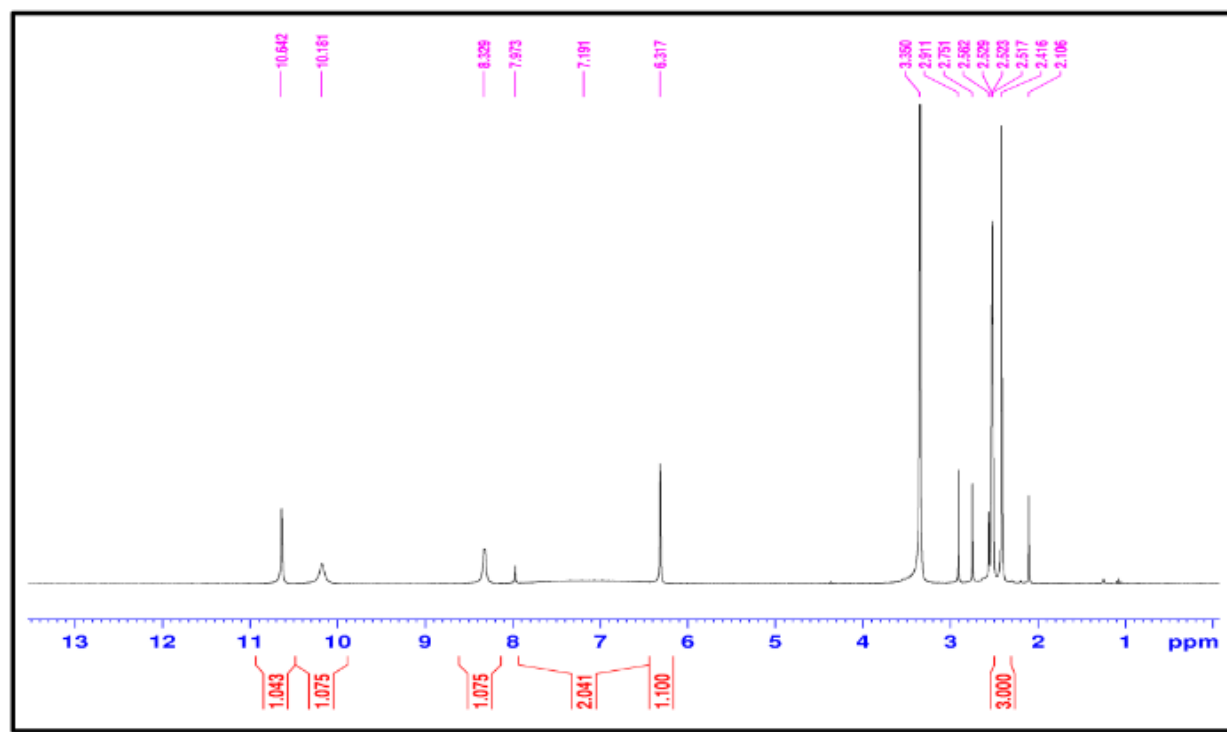

Figure S2.  $^1\text{H}$  NMR spectrum of PICS.

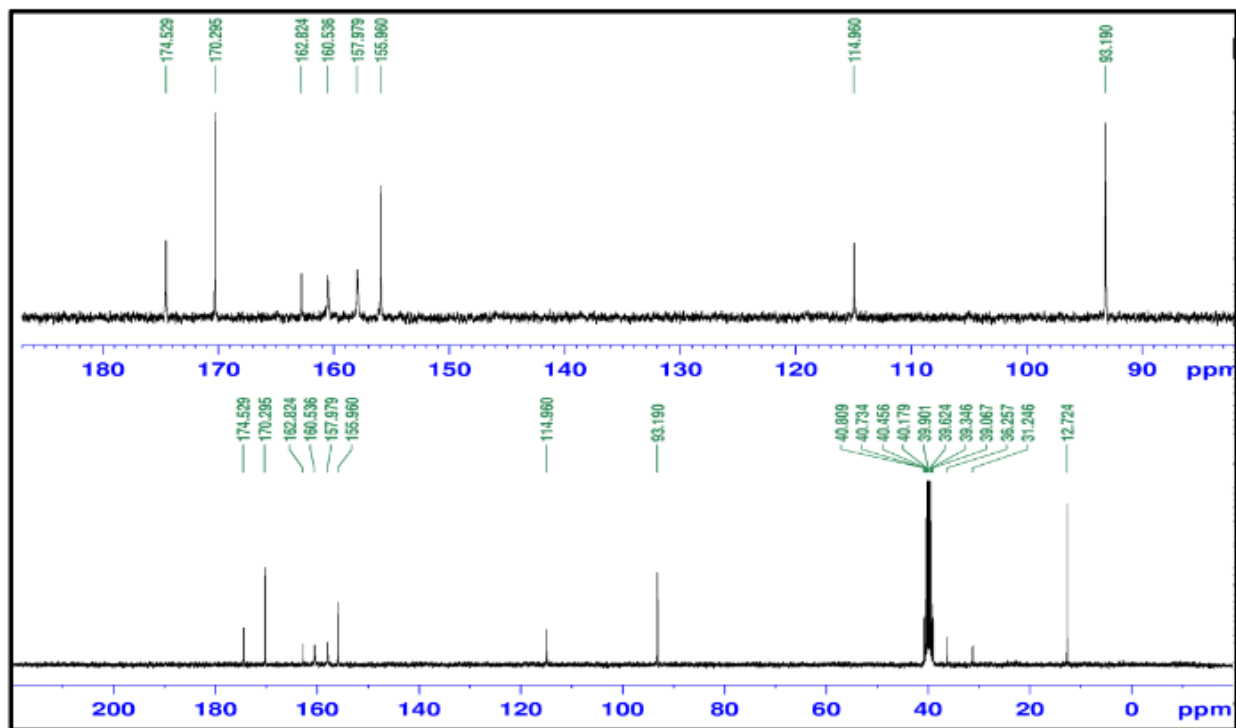

Figure S3.  $^{13}\text{C}$  NMR spectrum of PICS.

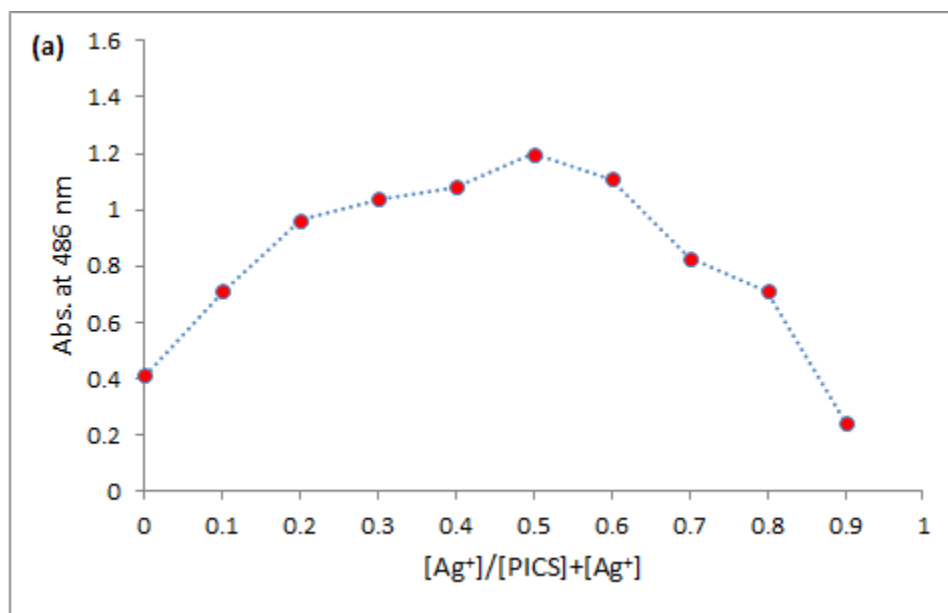

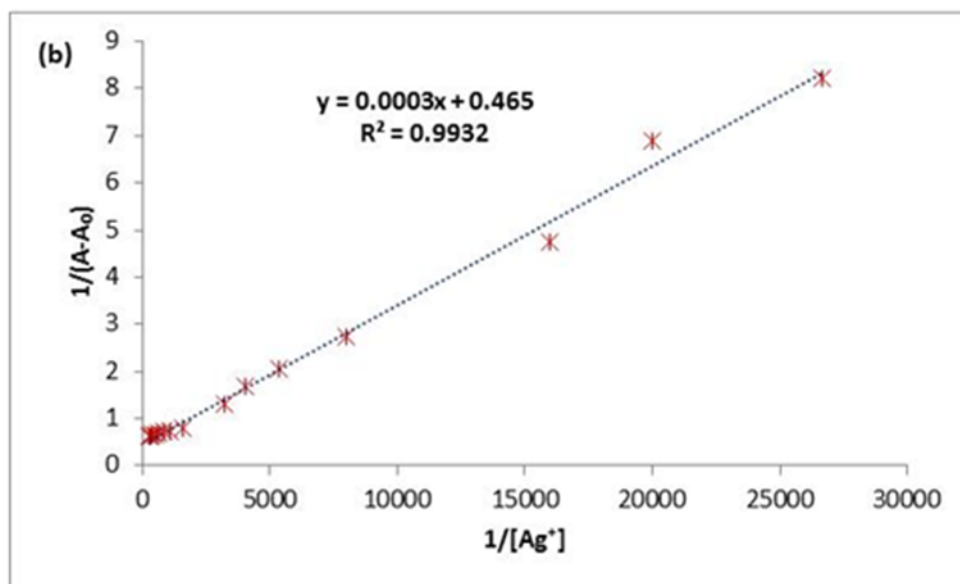

**Figure S4.** (a) Job's plot diagram for PICS- $Ag^+$  complexation, (b) Plot of  $1/(A-A_0)$  versus the  $1/[Ag^+]$  to estimate the bonding constant.
